1 **TITLE: Light dependent activation of the GCN2 kinase under cold and salt stress is**  
2 **mediated by the photosynthetic status of the chloroplast**

3

4 **AUTHORS:**

5 Ansul Lokdarshi<sup>1</sup>, Philip W. Morgan<sup>1</sup>, Michelle Franks<sup>1</sup>, Zoe Emert<sup>1</sup>, Catherine Emanuel<sup>2</sup>,  
6 Albrecht G von Arnim †<sup>1,3</sup>

7

8 **Affiliations:**

9 <sup>1</sup>) Department of Biochemistry & Cellular and Molecular Biology, The University of Tennessee,  
10 Knoxville, TN 37996-1939, USA

11 <sup>2</sup>) Department of Biology at Washington University in St. Louis, MO 63130-4899, USA

12 <sup>3</sup>) Graduate School of Genome Science and Technology, The University of Tennessee, Knoxville,  
13 TN 37996-1939, USA

14 † **Corresponding author:** Albrecht G. von Arnim ([vonarnim@utk.edu](mailto:vonarnim@utk.edu))

15 Department of Biochemistry & Cellular and Molecular Biology

16 309 Ken and Blaire Mossman Bldg.

17 1311 Cumberland Avenue

18 University of Tennessee

19 Knoxville, TN 37996-1939, USA

20

21 **Word count** (main text excluding legends, references): 4,228, 13 figures

22

23 **ORCID IDs:** 0000-0003-3472-3357 (AGvA); 0000-0003-2264-2701 (AL), 0000-0001-5884-

24 3543 (ZE), 0000-0003-0616-6987 (MF), 0000-0002-0439-8111(CE), 0000-0003-1669-4206 (PM)

25

26 **Email addresses of all authors:** [alokdars@utk.edu](mailto:alokdars@utk.edu), [pmorgan4@vols.utk.edu](mailto:pmorgan4@vols.utk.edu),

27 [mfranks4@vols.utk.edu](mailto:mfranks4@vols.utk.edu), [zemert@vols.utk.edu](mailto:zemert@vols.utk.edu), [catherineemanuel@wustl.edu](mailto:catherineemanuel@wustl.edu), [vonarnim@utk.edu](mailto:vonarnim@utk.edu)

28

29 **Key words:** GCN2, eIF2 $\alpha$ , cold, salt, light, translation, ROS

30

31 **Running Title:** Cold and salt stress activate GCN2

32

33 **ABSTRACT**

34

35 Regulation of cytosolic mRNA translation is a key node for rapid adaptation to environmental  
36 stress conditions. In yeast and animals, phosphorylation of the  $\alpha$ -subunit of eukaryotic translation  
37 initiation factor eIF2 is the most thoroughly characterized event in regulating global translation  
38 under stress. In plants, the GCN2 kinase (*General Control Non-derepressible-2*) is the only known  
39 kinase for eIF2 $\alpha$ . GCN2 is activated under a variety of stresses including reactive oxygen species.  
40 Here we provide new evidence that the GCN2 kinase in Arabidopsis is also activated rapidly and  
41 in a light dependent manner by cold and salt treatments. These treatments alone did not repress  
42 global mRNA ribosome loading in a major way. The activation of GCN2 was attenuated by  
43 inhibitors of photosynthesis and antioxidants, suggesting that it is gated by the redox poise or the  
44 reactive oxygen status of the chloroplast. In keeping with these results, *gcn2* mutant seedlings were  
45 more sensitive than wild type to both cold and salt in a root elongation assay. These data suggest  
46 that cold and salt stress may both affect the status of the cytosolic translation apparatus via the  
47 conserved GCN2-eIF2 $\alpha$  module. The potential role of the GCN2 kinase pathway in the global  
48 repression of translation under abiotic stress will be discussed.

49

50

51

## 52 INTRODUCTION

53

54 The translation of mRNAs by cytosolic ribosomes into new proteins is dynamically regulated by  
55 abiotic environmental conditions such as temperature (Matsuura et al., 2010; Juntawong et al.,  
56 2013; Yanguéz et al., 2013), oxygen (Branco-Price et al., 2008) and light (Juntawong and Bailey-  
57 Serres, 2012; Liu et al., 2012; Missra et al., 2015; Merchante et al., 2017). Both early and more  
58 recent studies have highlighted that redox poise and reactive oxygen species can also play  
59 important roles in regulating mRNA translation in global and mRNA sequence-specific ways  
60 (Tang et al., 2003; Branco-Price et al., 2008; Khandal et al., 2009; Benina et al., 2015). The  
61 mechanisms that regulate and coordinate mRNA ribosome loading across the plant transcriptome  
62 are generally only partially understood. Of the several mechanisms regulating global translation,  
63 phosphorylation of the  $\alpha$ -subunit of the heterotrimeric eukaryotic initiation factor 2 (eIF2) is one  
64 of the best characterized translational control events in yeast and animals (Dever et al., 1992;  
65 Donnelly et al., 2013; Hinnebusch et al., 2016). In the unphosphorylated form, eIF2 bound to GTP  
66 delivers the initiator methionyl-tRNA to the ribosomal small subunit (40S) to initiate mRNA  
67 translation (Hinnebusch et al., 2016). Upon phosphorylation by one of several kinases, eIF2 $\alpha$   
68 becomes a poisoned substrate of the guanine nucleotide exchange factor for eIF2, named eIF2B  
69 (Kashiwagi et al., 2018) causing global translational repression, although some mRNAs escape the  
70 global repression by virtue of specific mRNA sequence elements (Harding et al., 2000; Liu and  
71 Qian, 2014).

72

73 General Control Non-derepressible 2 (GCN2) is the only known kinase in plants that  
74 phosphorylates eIF2 $\alpha$  (Zhang et al., 2008; Lageix et al., 2008). In the well-studied vertebrate and  
75 yeast models, the GCN2 kinase can be activated by uncharged tRNA as a consequence of amino  
76 acid starvation (Wek et al., 1995; Dong et al., 2000; Anda et al., 2017). In plants the genetic  
77 elements of the GCN2 pathway appear to be substantially conserved, although not all biochemical  
78 details have been confirmed, and few of the biochemical steps have been investigated thoroughly.  
79 Specifically, GCN2 is encoded by a single gene in Arabidopsis that functionally complements a  
80 yeast *gcn2* mutant (Zhang et al., 2003) and can be activated by uncharged tRNA *in vitro* (Li et al.,  
81 2013). Accordingly, *in planta*, the kinase is activated by inhibitors of amino acid biosynthesis such  
82 as the herbicides chlorosulfuron, glyphosate and glufosinate (Lageix et al., 2008; Zhang et al.,

83 2008;Zhao et al., 2018), and the activation of GCN2 by herbicides can be suppressed by  
84 supplementation with amino acids (Zhang et al., 2008).

85

86 Aside from inhibitors of amino acid biosynthesis plant GCN2 kinase is activated by numerous  
87 other agents, including ultraviolet light, wounding, the ethylene precursor 1-aminocyclopropane  
88 carboxylic acid, the endogenous defense signals salicylic acid and methyl-jasmonate and bacterial  
89 infection (Lageix et al., 2008;Liu et al., 2019). What remains unclear is the nature of the  
90 biochemical signal that activates GCN2 under this variety of abiotic and biotic stresses. We  
91 recently described that GCN2 is activated by light-dependent reactive oxygen species (ROS) from  
92 the chloroplast. Even the stimulation of GCN2 by inhibitors of amino acid biosynthesis requires  
93 light and does not occur in darkness, suggesting that ROS are an essential requirement for GCN2  
94 activation (Lokdarshi et al., 2019). A second conundrum surrounding plant GCN2 is that *gcn2*  
95 mutants have rather mild phenotypes under favorable lab conditions (Zhang et al., 2008;Lageix et  
96 al., 2008;Liu et al., 2015b) and a near-normal transcriptome (Faus et al., 2015; Lokdarshi et al.,  
97 2019). Moreover, among the various treatments that activate eIF2 $\alpha$  phosphorylation, the herbicide  
98 chlorosulfuron is the only one that also results in a GCN2-dependent global translational repression  
99 (Lageix et al., 2008;Lokdarshi et al., 2019). In fact, the conditions that trigger eIF2 $\alpha$   
100 phosphorylation by the GCN2 kinase are not well correlated with the conditions under which *gcn2*  
101 mutant plants display maladaptive phenotypes.

102

103 Here we describe that the GCN2 kinase is activated by cold and salt stress in a light dependent  
104 manner. The activation of GCN2 by cold and salt can be suppressed by manipulating the status of  
105 the photosynthetic apparatus, suggesting that a chloroplastic signal contributes to the activation of  
106 GCN2. We also provide more evidence that eIF2 $\alpha$  phosphorylation by different stresses does not  
107 always result in the same decline in polyribosome loading. However, *gcn2* mutant seedlings from  
108 two different ecotypes of Arabidopsis show reduced primary root growth under cold and salt stress,  
109 in keeping with a physiological role for the GCN2 kinase to adapt to these conditions. Taken  
110 together, these data suggest that the retrograde signaling from chloroplast to cytosol that targets  
111 protein synthesis may operate via the GCN2 kinase under cold and salt stress.

112

113 **MATERIALS AND METHODS**

114

## 115 **Plant materials and growth conditions**

116 *Arabidopsis thaliana* ecotype Landsberg (Ler-0), Columbia (Col-0), and homozygous *gcn2-1*  
117 mutants of the GT8359 gene trap line (Zhang et al., 2008), and homozygous *gcn2-2* mutant seeds  
118 (Lokdarshi et al., 2019) were sterilized and stratified at 4°C for 2 days. Seeds were germinated on  
119 half-strength Murashige-Skoog (1/2X MS) plant media (MP Biomedicals, cat # 2633024) with  
120 0.65% Phytoagar (Bioworld, cat # 40100072-2) and grown under a long-day period of 16 h light  
121 ( $80\pm 10 \mu\text{Ein m}^{-2} \text{s}^{-1}$ )/8 h dark at 22 °C and 50% humidity. Unless stated, no sucrose was added to  
122 the medium.

123

## 124 **Stress treatments and phenotype characterization**

125 For cold stress treatment in dark and light, plates with 14-days-old horizontally grown seedlings  
126 were acclimated in the dark for 24 h starting at Zeitgeber time 2 (ZT2), after which they were  
127 shifted to 4 °C in the dark or light for the desired times. Dark-treated seedlings were harvested  
128 under green safe light. For salt stress treatment in the dark, plates with 9-days-old vertically grown  
129 seedlings were acclimated in darkness for 24 h starting at ZT2, after which seedlings were  
130 transferred to high salt or mock 1/2X MS salt media under green safe light and sampling was  
131 performed at the desired times. For salt stress treatment under light, seedlings were transferred to  
132 high salt (150mM NaCl), or control conditions (0.1% sucrose), or control conditions with  
133 equivalent osmolarity (300mM mannitol) starting at ZT2.

134

135 For chemical treatments with DCMU (Thermo-Fisher, cat# D2425) and DBMIB (Thermo-Fisher,  
136 cat# 271993) seedlings were sprayed with the desired amount of reagent and mock control (DMSO  
137 or water) under green safe light 30 minutes before the end of 24 hr dark acclimation. For  
138 antioxidant treatment, seedlings were germinated and grown for 10 days on 1/2X MS medium  
139 containing 0.5mM ascorbate and 0.5mM reduced glutathione.

140

141 For phenotype characterization under cold stress, 3-days-old vertically grown seedlings on 0.1%  
142 sucrose were transferred to media without sucrose and shifted to 4 °C for 30 days. For salt stress,  
143 3-days-old vertically grown seedlings without sucrose were transferred to media with 0.1%  
144 sucrose, or supplemented with 300mM mannitol, or 150mM NaCl. Photographs were taken with

145 a digital camera (Canon) and primary root length was measured using ImageJ (ver. 1.41;  
146 <http://rsb.info.nih.gov/ij/index.html>). Fresh weight measurements were performed by weighing  
147 seedlings per plate at the end of the stress treatment. Percent survival analysis for salt stress was  
148 performed by counting seedlings that showed bleached chlorophyll and no primary root growth  
149 from day 6 to day 9. All statistical analysis was performed using GraphPad Prism (ver. 8.1.2;  
150 GraphPad Software, Inc).

151

### 152 **Protein extraction and immunoblot analysis**

153 Sampling for total protein extraction was done by flash freezing 14-days-old seedlings in liquid  
154 nitrogen. Seedlings were ground using a plastic pestle in a 1.5 mL tube with extraction buffer  
155 containing 25 mM Tris-HCl (pH 7.5), 75 mM NaCl, 5% (v/v) glycerol, 0.05% (v/v) Nonidet P-40,  
156 0.5 mM EDTA, 0.5 mM EGTA, 2 mM DTT, 2% (w/v) insoluble PVP (Sigma P-6755),  
157 supplemented with 1X protease and phosphatase inhibitor cocktail (Thermo-Fisher; cat#  
158 PIA32959). Total protein content was quantified by Bradford assay (Thermo-Fisher, cat# 23236).

159

160 For eIF2 $\alpha$  phospho-immunoblot analysis, 50  $\mu$ g of total protein was separated on a 12% (w/v)  
161 SDS-PAGE gel and electroblotted onto polyvinylidene fluoride (PVDF) membrane. After 1 h of  
162 blocking at 22 °C with TBST buffer (1X Tris-buffered saline [pH7.6], 0.1% Tween-20) with 10%  
163 non-fat dry milk and 0.2% BSA, the membrane was incubated overnight at 4 °C with rabbit  
164 polyclonal phospho-eIF2 $\alpha$  antibody (Cell Signaling, cat # 9712S) diluted to 1:5000 in 1X TBST  
165 with 0.5% BSA. Following washing with 1X TBST, 10 min each for three repeats, the membrane  
166 was incubated with horseradish peroxidase conjugated anti-rabbit IgG (Vector labs, cat# PI-1000)  
167 diluted to 1:2000 in 1X TBST with 1% non-fat dry milk for 1 h at room temperature. After washing  
168 with 1X TBST, 10 min each for six repeats, horseradish peroxidase was detected using  
169 chemiluminescence (WesternBright Quantum, Advansta) as per manufacturer's protocol. For  
170 immunoblot with rabbit polyclonal eIF2 $\alpha$  antibody (a gift from Dr. Karen Browning, University  
171 of Texas, Austin), 5  $\mu$ g of total protein was resolved by SDS-PAGE and electroblotted onto a  
172 polyvinylidene difluoride (PVDF) membrane. Blocking and incubation with antibodies was  
173 performed as described (Dennis et al., 2009) followed by chemiluminescent detection (Lokdarshi  
174 et al., 2016). Signal intensity on immunoblots was quantified with ImageJ (ver. 1.41;  
175 <http://rsb.info.nih.gov/ij/index.html>).

176

### 177 **Polysome profiling and protein fractionation**

178 Tissue for polysome profiling was harvested as described for total protein extraction. For polysome  
179 profiling with cold stress tissue, seedlings were ground in liquid N<sub>2</sub> and 0.5g of tissue powder was  
180 resuspended in 1 mL of polysome extraction buffer (200 mM Tris-HCl pH 8.4, 50 mM KCl, 25  
181 mM MgCl<sub>2</sub>, 1% deoxycholic acid, 2% polyoxyethylene 10 tridecyl ether, 50 µg/mL cycloheximide  
182 and 40U/mL RNase inhibitor (Promega Cat# N2115)) and centrifuged at 13,000 x g for 5 min at  
183 4 °C. One mL of the supernatant was layered onto a 10 mL 15-50% linear gradient prepared using  
184 a Hoefer gradient maker and centrifuged at 35,000 rpm (Beckmann SW 41 Ti) for 3.5 hr at 4 °C.  
185 Absorbance at 254 nm was recorded using an ISCO UA 5 absorbance/fluorescence monitor and  
186 individual data points were extracted using the DATA acquisition software (DATAQ instruments).  
187 Polysome-to-monosome (P/M) ratios were calculated as described (Enganti et al., 2018). For  
188 polysome profiling with salt stressed tissue, 150 mg of tissue powder was resuspended in 100µl of  
189 polysome extraction buffer and centrifuged at 13,000 rpm for 5 minutes at 4°C. 100µl supernatant  
190 was layered on a 2 ml 15-50% linear gradient prepared as above and centrifuged at 50,000 rpm  
191 (Beckmann TLS55 rotor) for 1hr 10 minutes at 4°C. Absorbance was measured as described above.

192

### 193 **Hydrogen peroxide quantification**

194 H<sub>2</sub>O<sub>2</sub> content in seedlings was measured using the Amplex Red kit (Thermo-Fisher, cat# A22188).  
195 Briefly, 30 mg of 2-week-old seedlings were flash frozen in liquid N<sub>2</sub> and ground with a plastic  
196 pestle to a homogeneous powder. Pulverized tissue was resuspended in 100 µl of sterile 1X  
197 phosphate buffered saline (PBS) and centrifuged at 17000 x g at 4 °C for 2 minutes and the  
198 supernatant was used for H<sub>2</sub>O<sub>2</sub> measurements as per manufacturer's protocol. Relative  
199 fluorescence was measured on a POLARstar OPTIMA plate reader (BMG LABTECH) with an  
200 excitation filter at 535 nm and emission filter at 600 nm.

201

### 202 **Photosynthetic efficiency measurement**

203 The maximum quantum yield of photosystem II [ $Q_{y\max} = F_v / F_m$ ] was measured on a FluorCam  
204 800MF (Photon Systems Instruments) as per manufacturer's instructions and modifications from  
205 (Murchie and Lawson, 2013). Briefly, plants were dark adapted for 2 min ( $F_0$ ) prior to applying a  
206 saturating pulse of 1800 µEin m<sup>-2</sup> s<sup>-1</sup> for 0.8 sec ( $F_m$ ). Variable fluorescence ( $F_v$ ) was calculated as



207 the difference between  $F_o$  and  $F_m$  to get the maximum quantum yield [ $F_v/F_m$ ]. For measurements  
208 under cold stress, pots with rosette stage wild-type and *gcn2* mutant plants on soil were shifted to  
209 cold (4°C) or left at 22°C (mock) and measurements were taken for the indicated times. Recovery  
210 from cold was done by moving the pot back to 22°C. For  $F_v/F_m$  under salt stress, 3-days-old  
211 seedlings grown on 0.1% sucrose were shifted to 1/2X MS plant media supplemented with 150mM  
212 NaCl or no salt as control (Mock) and  $F_v/F_m$  measurements were recorded as discussed above.

213

## 214 **RESULTS**

215

### 216 **GCN2 kinase activation under cold stress is light dependent**

217 Previous reports (Lageix et al., 2008; Wang et al., 2017) showed eIF2 $\alpha$  phosphorylation as a read  
218 out of GCN2 activity under cold stress. Given that the response to cold stress is closely linked to  
219 photosynthesis (Crosatti et al., 2013; Adam and Murthy, 2014) we tested whether the activation of  
220 GCN2 under cold stress was light-dependent. In wild-type Arabidopsis seedlings subjected to 4 °C  
221 cold in the light, phosphorylation of eIF2 $\alpha$  increased gradually and remained high for at least 2  
222 hours of cold treatment. As expected, eIF2 $\alpha$  phosphorylation was mediated by GCN2 (Fig. 1A).  
223 In contrast, if the cold treatment was performed in dark-adapted plants, eIF2 $\alpha$  remained  
224 unphosphorylated (Fig. 1C). Under regular temperature conditions in the light, eIF2 $\alpha$ -P remained  
225 steady between ZT2 and ZT4 (Fig. 1B). Additionally, under all the test conditions the overall  
226 amount of eIF2 $\alpha$  remained unchanged (Fig. 1A-C). These results show that GCN2-dependent  
227 eIF2 $\alpha$  phosphorylation under cold stress is light dependent.

228

### 229 **Salt stress activates GCN2 in a light dependent manner**

230 eIF2 $\alpha$  has been shown to get phosphorylated in response to salt stress in mammals (Lu et al., 2001)  
231 and yeast (Goossens et al., 2001). To determine this response in plants, Arabidopsis seedlings  
232 grown in long-day were shifted to 150mM sodium chloride or an osmotically matched control  
233 (300mM mannitol) (Fig. 2A). Similar to other eukaryotes, salt treatment triggered eIF2 $\alpha$   
234 phosphorylation within 2 hours only in the wild type but not in the *gcn2-1* mutant seedlings (Fig.  
235 2A). In addition, mock transfer (to 0.1% sucrose) and transfer onto mannitol did not activate  
236 GCN2. Similar to cold stress, salt stress too has been linked to adverse effects on chloroplasts in  
237 terms of photosynthesis and ROS accumulation (Parida and Das, 2005; Suo et al., 2017; Robles and



238 Quesada, 2019). To test the role of light under salt triggered GCN2 activation, Arabidopsis  
239 seedlings were dark adapted for 24 h and shifted to salt or mock (0.1% sucrose) media. Salt  
240 treatment in the dark failed to activate GCN2 in wild-type seedlings, similar to the transfer control  
241 (Fig. 2B). Taken together, both cold and salt stress require light to activate GCN2.

242

### 243 **Antioxidants and photosynthetic inhibitors alleviate GCN2 activity**

244 In the light, low temperature and salt both affect the photosystem II (PS II), resulting in an increase  
245 in the PS II excitation pressure, which generates damaging reactive oxygen species, including  
246 hydrogen peroxide (Gray et al., 1996;Huner et al., 1998;Fowler and Thomashow, 2002;Murata et  
247 al., 2007). To test whether ROS may contribute to GCN2 activation under cold and salt stress,  
248 seedlings were grown in the light on media containing ascorbate and reduced glutathione before  
249 challenge with cold or salt stress. These antioxidants delayed the GCN2 activation, albeit weakly  
250 in the salt (Fig. 3A), possibly because antioxidants may be barely rate-limiting under these  
251 conditions. When eIF2-P was triggered with cold treatment, the presence of ascorbate and  
252 glutathione in the medium had only a minor effect (not shown) and there was no detectable boost  
253 in H<sub>2</sub>O<sub>2</sub> levels (Supplemental Figure 1). To address the role of photosynthetic electron transport  
254 for GCN2 activity, herbicides that manipulate the plastoquinone (PQ)/ plastoquinol (PQH<sub>2</sub>) pool,  
255 3-(3,4-dichlorophenyl)-1,1-dimethyl urea (DCMU) and 2,5-dibromo-3-methyl-6-isopropyl-p-  
256 benzoquinone (DBMIB) were applied shortly prior to the cold and salt treatments. DCMU keeps  
257 the plastoquinone pool more oxidized (PQ) and DBMIB more reduced (PQH<sub>2</sub>) (Mateo et al.,  
258 2004;Kruk and Karpinski, 2006). Both these herbicides suppressed cold and salt stress triggered  
259 GCN2 activation (Fig. 3C, D). These results along with the light dependence of cold and salt stress  
260 on GCN2 activation support the notion that chloroplast generated ROS or redox signals may  
261 contribute to the activation signal for GCN2, leading to eIF2 $\alpha$  phosphorylation.

262

### 263 ***gcn2* mutant sensitivity towards cold and salt stress**

264 To determine the role of GCN2 specifically under cold and salt stress conditions at the whole plant  
265 level, an established *GCN2* mutant allele (*gcn2-1*) (Lageix et al., 2008;Zhang et al., 2008) in the  
266 Landsberg ecotype and a recently characterized homozygous T-DNA insertion allele of *GCN2* in  
267 the Columbia ecotype (*gcn2-2*) (Lokdarshi et al., 2019) were tested for phenotypic abnormalities.

268 Under normal growth conditions, *gcn2-1* mutants were indistinguishable from wild type in terms  
269 of both shoot and primary root growth (Fig. 4 A, B). However, after challenge with cold stress,  
270 *gcn2-1* mutants root lengths were retarded compared to wild type (Fig. 4A, B) as were *gcn2-2*  
271 mutants (Supplemental Fig. 2A, B). Of note, the defect in overall growth in the *gcn2* mutants could  
272 not be attributed to any defects in the photosynthetic quantum efficiency (Supplemental Figure 3A  
273 and B).

274 Similar to the root growth retardation in the cold, exposure of seedlings to 150 mM NaCl salt also  
275 retarded primary root growth in the *gcn2* mutants (Fig. 5A, B; Supplemental Fig. 4A, B).  
276 Additionally, *gcn2* mutants showed chlorosis and root growth arrest by day 6 and day 9 (Fig. 5A;  
277 Supplemental Fig. 4A: denoted by asterisks). These effects were specific to salt and not seen in  
278 the osmotic control (mannitol) and transfer control (0.1% sucrose) treatments. The growth defect  
279 of the *gcn2* mutant on salt was evident by Day 6 and resulted in a significant loss of fresh weight  
280 and percent survival by Day 9 (Fig. 6A, B). As previously seen for cold stress, the quantum  
281 efficiency of PS II declined similarly for *gcn2* and wild type under salt stress (Supplemental Figure  
282 6). We conclude that the *GCN2* gene promotes adaptation of seedlings to cold and salt stress.

### 283 284 **mRNA-ribosome loading under cold and salt stress**

285  
286 GCN2 activity has been implicated in the down-regulation of mRNA translation under a variety  
287 of stress conditions (Lageix et al., 2008; Zhang et al., 2008; Liu et al., 2015a; Wang et al., 2017). To  
288 test the role of GCN2 in global mRNA translation under cold and salt stress, *gcn2* mutant and  
289 wild-type seedlings were challenged with the respective stresses under light. Polysome profiles  
290 from sucrose density gradients revealed overall similar profiles and polysome-to-monosome ratios  
291 for wild-type and *gcn2* under both normal growth conditions (Fig. 7A) and after cold stress (Fig.  
292 7B, C). Likewise, in response to salt stress, both wild-type and *gcn2* mutant displayed similar  
293 polysome profiles (Fig. 8). The trend towards slightly elevated ribosome loading in *gcn2-1*, while  
294 not uncommon, was not statistically significant. The lack of a clear effect on global polyribosome  
295 loading stands in contrast to data after herbicide treatment where ribosome loading declines in a  
296 GCN2-dependent manner (Lageix et al., 2008; Lokdarshi et al., 2019).

### 297 298 **DISCUSSION**

299

300 The GCN2-eIF2 $\alpha$  module is an integral component of a pan-eukaryotic stress response program.  
301 In yeast and mammals, GCN2 is activated by binding to uncharged tRNAs via its C-terminal  
302 HisRS domain. In plants, GCN2 kinase is activated under a wide range of abiotic stresses (e.g.,  
303 UV light, cold, wounding), synthetic agents (e.g., herbicides, purine starvation), hormones (e.g.,  
304 methyl jasmonate, salicylic acid, abscisic acid) and live bacterial pathogen (e.g., *Pseudomonas*  
305 *syringae*). More recently, Arabidopsis GCN2 was found to be activated in response to H<sub>2</sub>O<sub>2</sub>  
306 directly, as well as excess light stress and methyl viologen, treatments that produce ROS  
307 (Lokdarshi et al., 2019). In the present study, we show that both cold and salt challenge not only  
308 activate eIF2 $\alpha$ -P but require light to do so, similar to our recent findings of GCN2 activation in  
309 response to herbicide. Taken together, our study suggests that the highly conserved GCN2-eIF2 $\alpha$   
310 module is activated in a common manner by different stresses, possibly by ROS, given that H<sub>2</sub>O<sub>2</sub>  
311 is the only known signal to activate GCN2 in darkness (Lokdarshi et al., 2019). The precise  
312 biochemical mechanism remains to be determined.

313

314 Biochemically, the only known ligand to activate plant GCN2 *in vitro* are uncharged tRNAs, which  
315 presumably accumulate in the cell during amino acid starvation. Whether uncharged tRNAs are  
316 necessary and sufficient to activate GCN2 *in planta* under all stress conditions remains unclear. It  
317 is plausible that tRNA is bound to GCN2 as a coactivator but that additional signals are needed to  
318 boost kinase activity to physiologically relevant levels. Of note, recently Inglis and coworkers  
319 reported that mammalian GCN2 can be activated in a tRNA-independent mechanism by the  
320 ribosomal P-stalk protein complex (Sattlegger and Hinnebusch, 2000; Inglis et al., 2019). The  
321 mechanism of how GCN2 is activated *in planta* by tRNAs and ROS may also depend on the GCN2  
322 interacting proteins GCN1 and GCN20 (Wang et al., 2017; Izquierdo et al., 2018), similar to yeast  
323 and mammals; however plastidic ROS as a GCN2 activation signal is unique to plants.

324

325 It remains unclear whether and how the GCN2 mediated phosphorylation of eIF2 $\alpha$  under various  
326 conditions drives global translational repression as seen at the level of polyribosome loading, and  
327 how this response supports plant growth and development. The clearest causal chain of events is  
328 observed with herbicides that inhibit amino acid synthesis, where activation of GCN2 kinase by  
329 herbicide in the presence of light-conditioned ROS causes eIF2 $\alpha$  phosphorylation, followed by  
330 global translational repression, which is disrupted in the *gcn2* mutant (Lageix et al.,

2008;Lokdarshi et al., 2019). Moreover, the *gcn2* mutant is hypersensitive to herbicide (Zhang et al., 2008;Izquierdo et al., 2018), all in keeping with a simple, linear signaling pathway. However, it is much less clear how other GCN2-targeted abiotic stimuli affect translation, notwithstanding that it has been confirmed multiple times that eIF2 $\alpha$  phosphorylation is always mediated by GCN2. Here we showed that upon cold treatment, eIF2 $\alpha$  became phosphorylated by GCN2, but with no detectable translational repression by either cold or GCN2 kinase, although *gcn2* mutants were cold sensitive. We observed the same result for salt stress. Of note, salt stress at slightly higher intensity in rice (Ueda et al., 2012), but not cold stress in Arabidopsis (Juntawong et al., 2013) cause a drop in global ribosome loading. As for ROS, which we consider the most immediate activator of the GCN2 kinase, this stress represses translation as well as plant growth, but neither is detectably GCN2-dependent (Lokdarshi et al., 2019). The same pattern was seen in response to DTT and antimycinA (Izquierdo et al., 2018). Under high light, which is likely another relevant trigger of GCN2 in the natural environment, again, there is no GCN2-dependent translational repression, although *gcn2* mutants are sensitive to high light (Lokdarshi et al., 2019). For comparison, heat and hypoxia both rapidly repress global translation (Branco-Price et al., 2008;Matsuura et al., 2010;Yanguéz et al., 2013), but without any apparent phosphorylation of eIF2 $\alpha$ . Taken together, these observations clearly suggest that, despite the seemingly simple sequence of events in response to certain inhibitors of amino acid synthesis, not every instance of eIF2 $\alpha$  phosphorylation causes global translational repression, and only some but not all instances of global translational repression are conditioned on eIF2 $\alpha$  phosphorylation. These observations indicate that there must be additional translational control pathways that cooperate with GCN2-mediated eIF2 $\alpha$  phosphorylation to organize the translome under abiotic stress. Candidates are GCN1 and GCN20-mediated (Wang et al., 2017; Izquierdo et al., 2018), and autophagy-mediated processes (Zhao et al., 2018; Yoon and Chung, 2019) and processes involving SnRK-TOR signaling (Margalha et al., 2019) and stress granules (Chantarachot and Bailey-Serres, 2018). This conclusion is also in keeping with the emerging role of GCN2 in responses to plant pathogens. Under certain conditions, pathogens or effectors of immunity activate GCN2 or eIF2 $\alpha$  phosphorylation (Pajerowska-Mukhtar et al., 2012;Liu et al., 2019) while in other conditions they do not (Zhang et al., 2008;Meteignier et al., 2017;Izquierdo et al., 2018). Certain pathogens do trigger translational reorganizations (Moeller et al., 2012;Xu et al., 2017) and GCN2 is involved in responses to bacterial pathogens (Liu et al., 2015b;Liu et al., 2019;Lokdarshi et al., 2019)

362 although the precise role of GCN2 kinase signaling in defense related translational control remains  
363 to be defined.

364

365 Overall, the findings presented in this study add to a unified model of the regulation of the cytosolic  
366 translation apparatus via the highly conserved GCN2-eIF2 $\alpha$  module under a variety of abiotic  
367 stresses, that may also extend to biotic stresses in plants. In summary, we show that activation of  
368 GCN2 by cold and salt stress is dependent on the redox state of the chloroplast, and loss of *GCN2*  
369 results in the increased sensitivity towards common abiotic stress inputs, cold and salt. In the  
370 future, determining what biochemical and molecular events lead to GCN2 activation under these  
371 natural stress inputs will shed light on the integrated stress response pathway in plants.  
372 Additionally, the regulation of global translation versus specific mRNAs that fall under stress type  
373 regulation is also a subject of further investigation.

374

#### 375 **ACKNOWLEDGMENTS**

376

377 We thank Dr. Karen Browning for the antibody against eIF2 $\alpha$  and Ricardo Urquidi-Camacho for  
378 assistance with data analysis and discussion.

379

#### 380 **AUTHOR CONTRIBUTIONS**

381

382 AL, PM, MF, ZE and CE performed the experiments

383 AL, AVA – Analyzed the results and wrote the manuscript

384

385 **Conflict of Interest Statement:** The authors declare that the research was conducted in the  
386 absence of any commercial or financial relationships that could be construed as a potential conflict  
387 of interest.

388

#### 389 **FUNDING**

390

391 This work was supported by grants from the National Science Foundation (IOS-1456988 and  
392 MCB-1546402) and the National Institutes of Health NIH R15 GM129672 to AGvA.

393

394 **SUPPLEMENTARY MATERIAL**

395

396 **Supplemental Figure 1. Cold treatment barely modulates hydrogen peroxide levels.**

397 **Supplemental Figure 2. Loss of *GCN2* renders increased sensitivity towards cold stress in**  
398 **the Columbia ecotype.**

399 **Supplemental Figure 3. Effect of cold stress on photosynthetic efficiency of wild-type and**  
400 ***gcn2* mutants.**

401 **Supplemental Figure 4. Loss of *GCN2* renders increased sensitivity towards salt stress in**  
402 **the Columbia ecotype.**

403 **Supplemental Figure 5. Effect of salt stress on photosynthetic efficiency of wild-type and**  
404 ***gcn2*.**

405

406 **FIGURE LEGENDS**

407

408 **Figure 1. GCN2 kinase activation by cold is light dependent.**

409 **(A)** Top - Schematic of the light regimen. Seedlings were grown in a 16 hr light 8 hr dark cycle  
410 and shifted to 4°C starting at zeitgeber time (ZT)2. The red arrow at ZT2 indicates the beginning  
411 of cold treatment and the start of sampling.

412 Bottom - Immunoblot showing the time course of eIF2 $\alpha$  phosphorylation in 14-days-old wild-type  
413 Landsberg (Wt(Ler)) and *gcn2-1* mutant (*gcn2-1*) seedlings subjected to cold stress as described  
414 in panel A. Upper panel: Probed with phospho-specific antibody against eIF2 $\alpha$ -P (38kDa). Middle  
415 panel: Rubisco large subunit (~ 55kDa) as a loading control after Ponceau S staining of the blot.  
416 Lower panel: Probed with antibody against eIF2 $\alpha$  (38kDa). (+), arbitrary amount of total protein  
417 extract from glyphosate treated Wt seedlings indicating unphosphorylated (eIF2 $\alpha$ ) or  
418 phosphorylated (eIF2 $\alpha$ -P) protein; (10, 30, 120) sampling time in minutes; (M) Molecular weight  
419 marker. Also shown on the right is the variation in eIF2 $\alpha$ -P levels (percent intensity) across the  
420 tested time periods in Wt seedlings. Error bars represent Std. deviation from five biological  
421 replicates.

422 **(B)** Time course of eIF2 $\alpha$  phosphorylation as in panel (A) but with Wt seedlings maintained at  
423 22°C as a control. A partially cropped top band in the eIF2 $\alpha$ -P blot indicates non-specific binding  
424 of the eIF2 $\alpha$ -P antibody.

425 (C) eIF2 $\alpha$  phosphorylation in Wt seedlings under 4°C in the dark. Seedlings were grown in a 16  
426 hr light 8 hr dark cycle, dark-acclimated for 24 hr and shifted to 4°C in the dark. Time = 0 indicates  
427 the beginning of the cold treatment and the start of sampling in dark.

428

429 **Figure 2. Salt stress activates GCN2 kinase in light.**

430 (A) Top - Schematic of growth regimen for seedlings under 16hr light and 8hr dark cycle. The red  
431 arrow at ZT2=0 indicates the beginning of stress treatment and the start of sampling.

432 Bottom - eIF2 $\alpha$  phosphorylation in 10-days-old wild-type Landsberg (Wt (Ler)) and *gcn2-1*  
433 mutant (*gcn2-1*) seedlings shifted to media supplemented with 0.1% sucrose (Mock), 150mM  
434 Mannitol (Mannitol) or, 150mM NaCl (NaCl). For details see legend to Fig. 1A. (B) Top -  
435 Schematics of 24 hr dark acclimation starting at ZT2.

436 Bottom - eIF2 $\alpha$  phosphorylation in Wt seedlings after shifting to 150mM NaCl in the dark. For  
437 details see legend to Fig. 1C.

438

439 **Figure 3. Antioxidant and photosynthetic inhibitors mitigate GCN2 kinase activation under  
440 cold and salt stress.**

441 (A) Time course of eIF2 $\alpha$  phosphorylation in wild-type Landsberg (Wt) seedlings grown on media  
442 supplemented with 0.5mM ascorbate and reduced glutathione for 10-days and shifted to with  
443 150mM NaCl with either antioxidants (Asc + GSH) or mock control. Transfer and sampling of  
444 seedlings was performed as described in Fig. 2A.

445 (B, C) eIF2 $\alpha$  phosphorylation in Wt seedlings treated with either DMSO control (Mock), or 8 $\mu$ M  
446 of 3-(3,4-dichlorophenyl)-1,1-dimethylurea (DCMU), or 16 $\mu$ M of 2,5-Dibromo-6-isopropyl-3-  
447 methyl-1,4-benzoquinone (DBMIB) thirty minutes prior to (B) NaCl or (C) 4°C treatment. For  
448 details see legend to Fig. 1, 2.

449

450 **Figure 4. Loss of GCN2 renders increased sensitivity towards cold stress.**

451 (A) Top - Representative images of 3-days-old wild-type Landsberg (Wt (Ler)) and *gcn2-1* mutant  
452 (*gcn2-1*) seedlings grown under a 16 hr light and 8 hr dark cycle (long day, LD) at 22°C. Seedlings  
453 were grown on media with 0.1% sucrose for 3-days and transferred to no sucrose (Day 0).

454 Bottom - Same seedlings after 30 days of LD cycle at 4°C. Scale bars are 10mm.



455 **(B)** Primary root length of Wt and *gcn2-1* mutant seedlings from panel A. Error bars indicate  
456 standard error of the mean from four biological replicates with n>80 per experiment. (Welch's t-  
457 test \*P-value <0.05)

458

459 **Figure 5. *gcn2* mutants are more sensitive to salt stress.**

460 **(A)** Representative images of wild-type Landsberg (Wt (Ler)) and *gcn2-1* mutant (*gcn2-1*)  
461 seedlings grown under 16 hr light and 8 hr dark period on plant media supplemented with 150mM  
462 NaCl (salt treatment), 300mM Mannitol (osmotic control), or 0.1% sucrose (transfer control) . On  
463 the day of transfer (Day 0) seedlings were 3 days old on 0.1% sucrose. Scale bar is 10mm.

464 **(B)** Primary root length of Wt and *gcn2-1* mutants from panel (A). Error bars indicate standard  
465 error of the mean of four biological replicates with n>36 per experiment (Welch's t-test \*P-value  
466 <0.05; \*\* P-value <0.005).

467

468 **Figure 6. *gcn2* mutants accumulate less fresh weight and exhibit low survival under salt  
469 stress.**

470 **(A)** Left panel - Fresh weight (grams) of wild-type Landsberg (Wt(Ler)) and *gcn2-1* mutant (*gcn2-1*)  
471 seedlings after 9-days of growth on 0.1% sucrose or, 300mM Mannitol or, 150mM NaCl. Right  
472 panel - Percent survival of Wt and *gcn2-1* mutant seedlings at day 6 and day 9 on 150mM NaCl.  
473 Analysis performed on seedlings from Fig. 5

474 **(B)** Fresh weight and percent survival of wild-type Columbia (Wt (Col)) and *gcn2-2* mutant (*gcn2-2*)  
475 seedlings as described in panel A. Analysis performed on seedlings from Supplemental Fig. 4  
476 Error bars indicate standard error of the mean of four biological replicates with n>36 per  
477 experiment (Welch's t-test \*P-value <0.05; \*\*P-value <0.005; \*\*\* P-value <0.0005).

478

479 **Figure 7. Ribosome-RNA profile of wild-type and *gcn2-1* under standard growth conditions  
480 and cold stress.**

481 Top - **(A, B)** Schematic of light regimen showing seedling growth in long day period (16 hr light  
482 and 8 hr dark) indicating the beginning of cold (4°C) treatment starting at ZT2 (blue arrow) and  
483 the sampling time at ZT4 (red arrow).

484 Bottom - UV Absorbance profile at 254nm of 14-days-old wild-type Landsberg (Wt(ler)) and  
485 *gcn2-1* mutant (*gcn2-1*) seedlings at (A) 22°C at ZT4 (Mock) or subjected to cold at 4°C (B) for  
486 2 hr, or (C) for 24 hr under a long day period.

487 The positions of the 40S, 60S, 80S and the polysomes are indicated on the profiles. The ratio of  
488 polysomes (P) to monosomes (M) is indicated with standard error from 3 replicates.

489

490 **Figure 8. Ribosome-RNA profile of wild-type and *gcn2* mutant under salt stress.**

491 Representative UV absorbance (A<sub>254</sub>) profile of 10-days-old Wild-type Landsberg (Wt(Ler)) and  
492 *gcn2-1* mutant (*gcn2-1*) seedlings after 2 hr of treatment with (A) 0.1% sucrose (Mock) or (B)  
493 NaCl. Seedling transfer was performed as described in Figure 2. Positions of the 40S, 60S, 80S  
494 and the polysome are indicated on the profile.

495

496 **REFERENCES:**

- 497 Adam, S., and Murthy, S.D.S. (2014). "Effect of Cold Stress on Photosynthesis of Plants and Possible  
498 Protection Mechanisms," in *Approaches to Plant Stress and their Management*, eds. R.K. Gaur &  
499 P. Sharma. (New Delhi: Springer India), 219-226.
- 500 Anda, S., Zach, R., and Grallert, B. (2017). Activation of Gcn2 in response to different stresses. *PLoS*  
501 *One* 12, e0182143.
- 502 Benina, M., Ribeiro, D.M., Gechev, T.S., Mueller-Roeber, B. and Schippers, J.H. (2015). A cell type-  
503 specific view on the translation of mRNAs from ROS-responsive genes upon paraquat treatment  
504 of *Arabidopsis thaliana* leaves. *Plant Cell Env* 38, 349-363.
- 505 Branco-Price, C., Kaiser, K.A., Jang, C.J., Larive, C.K., and Bailey-Serres, J. (2008). Selective mRNA  
506 translation coordinates energetic and metabolic adjustments to cellular oxygen deprivation and  
507 reoxygenation in *Arabidopsis thaliana*. *Plant J* 56, 743-755.
- 508 Chantarachot, T., and Bailey-Serres, J. (2018). Polysomes, Stress Granules, and Processing Bodies: A  
509 Dynamic Triumvirate Controlling Cytoplasmic mRNA Fate and Function. *Plant Physiol* 176,  
510 254-269.
- 511 Crosatti, C., Rizza, F., Badeck, F.W., Mazzucotelli, E., and Cattivelli, L. (2013). Harden the chloroplast  
512 to protect the plant. *Physiologia Plantarum* 147, 55-63.
- 513 Dennis, M.D., Person, M.D., and Browning, K.S. (2009). Phosphorylation of plant translation initiation  
514 factors by CK2 enhances the in vitro interaction of multifactor complex components. *J Biol Chem*  
515 284, 20615-20628.
- 516 Dever, T.E., Feng, L., Wek, R.C., Cigan, A.M., Donahue, T.F., and Hinnebusch, A.G. (1992).  
517 Phosphorylation of initiation factor 2 alpha by protein kinase GCN2 mediates gene-specific  
518 translational control of GCN4 in yeast. *Cell* 68, 585-596.
- 519 Dong, J., Qiu, H., Garcia-Barrio, M., Anderson, J., and Hinnebusch, A.G. (2000). Uncharged tRNA  
520 activates GCN2 by displacing the protein kinase moiety from a bipartite tRNA-binding domain.  
521 *Mol Cell* 6, 269-279.
- 522 Donnelly, N., Gorman, A.M., Gupta, S., and Samali, A. (2013). The eIF2alpha kinases: their structures  
523 and functions. *Cell Mol Life Sci* 70, 3493-3511.

- 524 Enganti, R., Cho, S.K., Toperzer, J.D., Urquidi-Camacho, R.A., Cakir, O.S., Ray, A.P., Abraham, P.E.,  
525 Hettich, R.L., and von Arnim, A.G. (2018). Phosphorylation of Ribosomal Protein RPS6  
526 Integrates Light Signals and Circadian Clock Signals. *Frontiers in Plant Science* 8, 2210.
- 527 Faus, I., Zabalza, A., Santiago, J., Nebauer, S.G., Royuela, M., Serrano, R., and Gadea, J. (2015). Protein  
528 kinase GCN2 mediates responses to glyphosate in Arabidopsis. *BMC Plant Biol* 15, 14.
- 529 Fowler, S., and Thomashow, M.F. (2002). Arabidopsis transcriptome profiling indicates that multiple  
530 regulatory pathways are activated during cold acclimation in addition to the CBF cold response  
531 pathway. *Plant Cell* 14, 1675-1690.
- 532 Goossens, A., Dever, T.E., Pascual-Ahuir, A., and Serrano, R. (2001). The protein kinase Gcn2p mediates  
533 sodium toxicity in yeast. *J Biol Chem* 276, 30753-30760.
- 534 Gray, G.R., Savitch, L.V., Ivanov, A.G., and Huner, N. (1996). Photosystem II Excitation Pressure and  
535 Development of Resistance to Photoinhibition (II. Adjustment of Photosynthetic Capacity in  
536 Winter Wheat and Winter Rye). *Plant Physiol* 110, 61-71.
- 537 Harding, H.P., Novoa, I., Zhang, Y., Zeng, H., Wek, R., Schapira, M., and Ron, D. (2000). Regulated  
538 translation initiation controls stress-induced gene expression in mammalian cells. *Mol Cell* 6,  
539 1099-1108.
- 540 Hinnebusch, A.G., Ivanov, I.P., and Sonenberg, N. (2016). Translational control by 5'-untranslated  
541 regions of eukaryotic mRNAs. *Science* 352, 1413-1416.
- 542 Huner, N.P.A., Oquist, G., and Sarhan, F. (1998). Energy balance and acclimation to light and cold.  
543 *Trends in Plant Science* 3, 224-230.
- 544 Inglis, A.J., Masson, G.R., Shao, S., Perisic, O., Mclaughlin, S.H., Hegde, R.S., and Williams, R.L.  
545 (2019). Activation of GCN2 by the ribosomal P-stalk. *Proc Natl Acad Sci U S A* 116, 4946-4954.
- 546 Izquierdo, Y., Kulasekaran, S., Benito, P., Lopez, B., Marcos, R., Cascon, T., Hamberg, M., and  
547 Castresana, C. (2018). Arabidopsis nonresponding to oxylipins locus NOXY7 encodes a yeast  
548 GCN1 homolog that mediates noncanonical translation regulation and stress adaptation. *Plant*  
549 *Cell and Environment* 41, 1438-1452.
- 550 Juntawong, P., and Bailey-Serres, J. (2012). Dynamic light regulation of translation status in Arabidopsis  
551 thaliana. *Frontiers in Plant Science* 3, 66.
- 552 Juntawong, P., Sorenson, R., and Bailey-Serres, J. (2013). Cold shock protein 1 chaperones mRNAs  
553 during translation in Arabidopsis thaliana. *Plant J* 74, 1016-1028.
- 554 Kashiwagi, K., Yokoyama, T., Nishimoto, M., Takahashi, M., Sakamoto, A., Yonemochi, M., Shirouzu,  
555 M., and Ito, T. (2018). Structural Basis for eIF2B Inhibition in Integrated Stress Response.  
556 *Science* 364, 495-499.
- 557 Khandal, D., Samol, I., Buhr, F., Pollmann, S., Schmidt, H., Clemens, S., Reinbothe, S., and Reinbothe,  
558 C. (2009). Singlet oxygen-dependent translational control in the tigrina-d.12 mutant of barley.  
559 *Proceedings of the National Academy of Sciences of the United States of America* 106, 13112-  
560 13117.
- 561 Kruk, J., and Karpinski, S. (2006). An HPLC-based method of estimation of the total redox state of  
562 plastoquinone in chloroplasts, the size of the photochemically active plastoquinone-pool and its  
563 redox state in thylakoids of Arabidopsis. *Biochim Biophys Acta* 1757, 1669-1675.
- 564 Lageix, S., Lanet, E., Pouch-Pelissier, M.N., Espagnol, M.C., Robaglia, C., Deragon, J.M., and Pelissier,  
565 T. (2008). Arabidopsis eIF2alpha kinase GCN2 is essential for growth in stress conditions and is  
566 activated by wounding. *BMC Plant Biol* 8, 134.
- 567 Li, M.W., Auyeung, W.K., and Lam, H.M. (2013). The GCN2 homologue in Arabidopsis thaliana  
568 interacts with uncharged tRNA and uses Arabidopsis eIF2alpha molecules as direct substrates.  
569 *Plant Biol (Stuttg)* 15, 13-18.
- 570 Liu, B., and Qian, S.B. (2014). Translational reprogramming in cellular stress response. *Wiley Interdiscip*  
571 *Rev RNA* 5, 301-315.
- 572 Liu, M.J., Wu, S.H., Chen, H.M., and Wu, S.H. (2012). Widespread translational control contributes to  
573 the regulation of Arabidopsis photomorphogenesis. *Molecular Systems Biology* 8, 566.

- 574 Liu, X., Afrin, T., and Pajerowska-Mukhtar, K.M. (2019). Arabidopsis GCN2 kinase contributes to ABA  
575 homeostasis and stomatal immunity. *Communications Biology* 2, 302.
- 576 Liu, X., Kørner, C.J., Hajdu, D., Guo, T., Ramonell, K.M., Argueso, C.T., and Pajerowska-Mukhtar,  
577 K.M. (2015a). ARABIDOPSIS THALIANA AtGCN2 KINASE IS INVOLVED IN DISEASE  
578 RESISTANCE AGAINST PATHOGENS WITH DIVERSE LIFE STYLES. *International*  
579 *Journal of Phytopathology* 4, 12.
- 580 Liu, X., Merchant, A., Rockett, K.S., McCormack, M., and Pajerowska-Mukhtar, K.M. (2015b).  
581 Characterization of Arabidopsis thaliana GCN2 kinase roles in seed germination and plant  
582 development. *Plant Signal Behav* 10, e992264.
- 583 Lokdarshi, A., Conner, W.C., Mcclintock, C., Li, T., and Roberts, D.M. (2016). Arabidopsis CML38, a  
584 Calcium Sensor That Localizes to Ribonucleoprotein Complexes under Hypoxia Stress. *Plant*  
585 *Physiol* 170, 1046-1059.
- 586 Lokdarshi, A., Guan, J., Urquidi Camacho, R.A., Cho, S.K., Morgan, P.W., Leonard, M., Shimono, M.,  
587 Day, B., and von Arnim, A.G. (2019). Light activates the translational regulatory GCN2 kinase  
588 via reactive oxygen species emanating from the chloroplast. *bioRxiv*, 794362.
- 589 Lu, L., Han, A.P., and Chen, J.J. (2001). Translation initiation control by heme-regulated eukaryotic  
590 initiation factor 2alpha kinase in erythroid cells under cytoplasmic stresses. *Mol Cell Biol* 21,  
591 7971-7980.
- 592 Margalha, L., Confraria, A., and Baena-González, E. (2019). SnRK1 and TOR: modulating growth-  
593 defense trade-offs in plant stress responses. *Journal of Experimental Botany* 70, 2261-2274.
- 594 Mateo, A., Muhlenbock, P., Rusterucci, C., Chang, C.C., Miszalski, Z., Karpinska, B., Parker, J.E.,  
595 Mullineaux, P.M., and Karpinski, S. (2004). LESION SIMULATING DISEASE 1 is required for  
596 acclimation to conditions that promote excess excitation energy. *Plant Physiol* 136, 2818-2830.
- 597 Matsuura, H., Kiyotaka, U., Ishibashi, Y., Kubo, Y., Yamaguchi, M., Hirata, K., Demura, T., and Kato,  
598 K. (2010). A short period of mannitol stress but not LiCl stress led to global translational  
599 repression in plants. *Biosci Biotechnol Biochem* 74, 2110-2112.
- 600 Merchante, C., Stepanova, A.N., and Alonso, J.M. (2017). Translation regulation in plants: an interesting  
601 past, an exciting present and a promising future. *Plant J* 90, 628-653.
- 602 Meteignier, L.V., El Oirdi, M., Cohen, M., Barff, T., Matteau, D., Lucier, J.F., Rodrigue, S., Jacques,  
603 P.E., Yoshioka, K., and Moffett, P. (2017). Translatome analysis of an NB-LRR immune  
604 response identifies important contributors to plant immunity in Arabidopsis. *J Exp Bot* 68, 2333-  
605 2344.
- 606 Missra, A., Ernest, B., Lohoff, T., Jia, Q., Satterlee, J., Ke, K., and Von Arnim, A.G. (2015). The  
607 Circadian Clock Modulates Global Daily Cycles of mRNA Ribosome Loading. *Plant Cell* 27,  
608 2582-2599.
- 609 Moeller, J.R., Moscou, M.J., Bancroft, T., Skadsen, R.W., Wise, R.P., and Whitham, S.A. (2012).  
610 Differential accumulation of host mRNAs on polyribosomes during obligate pathogen-plant  
611 interactions. *Mol Biosyst* 8, 2153-2165.
- 612 Murata, N., Takahashi, S., Nishiyama, Y., and Allakhverdiev, S.I. (2007). Photoinhibition of photosystem  
613 II under environmental stress. *Biochim Biophys Acta* 1767, 414-421.
- 614 Murchie, E.H., and Lawson, T. (2013). Chlorophyll fluorescence analysis: a guide to good practice and  
615 understanding some new applications. *J Exp Bot* 64, 3983-3998.
- 616 Pajerowska-Mukhtar, K.M., Wang, W., Tada, Y., Oka, N., Tucker, C.L., Fonseca, J.P. and Dong, X.  
617 (2012). The HSF-like transcription factor TBF1 is a major molecular switch for plant growth-to-  
618 defense transition. *Curr Biol* 22, 103-112.
- 619 Parida, A.K., and Das, A.B. (2005). Salt tolerance and salinity effects on plants: a review. *Ecotoxicol*  
620 *Environ Saf* 60, 324-349.
- 621 Robles, P., and Quesada, V. (2019). Transcriptional and Post-transcriptional Regulation of Organellar  
622 Gene Expression (OGE) and Its Roles in Plant Salt Tolerance. *Int J Mol Sci* 20, pii: E1056.

- 623 Sattlegger, E., and Hinnebusch, A.G. (2000). Separate domains in GCN1 for binding protein kinase  
624 GCN2 and ribosomes are required for GCN2 activation in amino acid-starved cells. *The EMBO*  
625 *Journal* 19, 6622-6633.
- 626 Suo, J., Zhao, Q., David, L., Chen, S., and Dai, S. (2017). Salinity Response in Chloroplasts: Insights  
627 from Gene Characterization. *Int J Mol Sci* 18, pii: E1011.
- 628 Tang, L., Bhat, S., and Petracek, M.E. (2003). Light control of nuclear gene mRNA abundance and  
629 translation in tobacco. *Plant Physiol* 133, 1979-1990.
- 630 Ueda, K., Matsuura, H., Yamaguchi, M., Demura, T., and Kato, K. (2012). Genome-wide analyses of  
631 changes in translation state caused by elevated temperature in *Oryza sativa*. *Plant Cell Physiol* 53,  
632 1481-1491.
- 633 Wang, L., Li, H., Zhao, C., Li, S., Kong, L., Wu, W., Kong, W., Liu, Y., Wei, Y., Zhu, J.K., and Zhang,  
634 H. (2017). The inhibition of protein translation mediated by AtGCN1 is essential for cold  
635 tolerance in *Arabidopsis thaliana*. *Plant Cell Environ* 40, 56-68.
- 636 Wek, S.A., Zhu, S., and Wek, R.C. (1995). The histidyl-tRNA synthetase-related sequence in the eIF-2  
637 alpha protein kinase GCN2 interacts with tRNA and is required for activation in response to  
638 starvation for different amino acids. *Mol Cell Biol* 15, 4497-4506.
- 639 Xu, G., Greene, G.H., Yoo, H., Liu, L., Marqués, J., Motley, J., and Dong, X. (2017). Global translational  
640 reprogramming is a fundamental layer of immune regulation in plants. *Nature* 545, 487.
- 641 Yanguez, E., Castro-Sanz, A.B., Fernandez-Bautista, N., Oliveros, J.C., and Castellano, M.M. (2013).  
642 Analysis of genome-wide changes in the translome of *Arabidopsis* seedlings subjected to heat  
643 stress. *PLoS One* 8, e71425.
- 644 Yoon, S.H., and Chung, T. (2019). Protein and RNA Quality Control by Autophagy in Plant Cells.  
645 *Molecules and cells* 42, 285-291.
- 646 Zhang, Y., Dickinson, J.R., Paul, M.J., and Halford, N.G. (2003). Molecular cloning of an *Arabidopsis*  
647 homologue of GCN2, a protein kinase involved in co-ordinated response to amino acid starvation.  
648 *Planta* 217, 668-675.
- 649 Zhang, Y., Wang, Y., Kanyuka, K., Parry, M.A., Powers, S.J., and Halford, N.G. (2008). GCN2-  
650 dependent phosphorylation of eukaryotic translation initiation factor-2alpha in *Arabidopsis*. *J Exp*  
651 *Bot* 59, 3131-3141.
- 652 Zhao, L., Deng, L., Zhang, Q., Jing, X., Ma, M., Yi, B., Wen, J., Ma, C., Tu, J., Fu, T., and Shen, J.  
653 (2018). Autophagy contributes to sulfonyleurea herbicide tolerance via GCN2-independent  
654 regulation of amino acid homeostasis. *Autophagy* 14, 702-714.

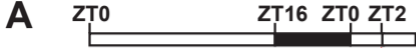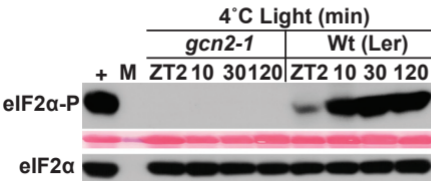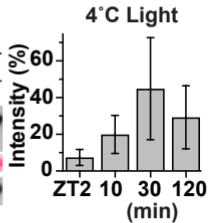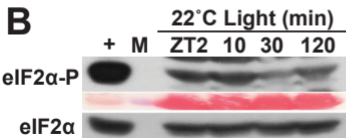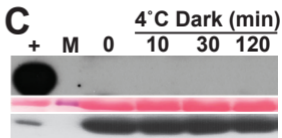

**A**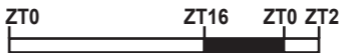

Wt (Ler) (min)

Mock

Mannitol

NaCl

+    M    ZT2    10    30    120                      10    30    120                      10    30    120

eIF2 $\alpha$ -P

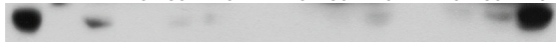

eIF2 $\alpha$

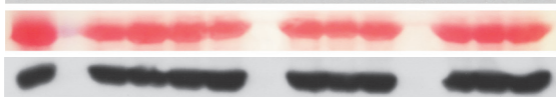

*gcn2-1* (min)

Mock

Mannitol

NaCl

+    M    ZT2    10    30    120                      10    30    120                      10    30    120

eIF2 $\alpha$ -P

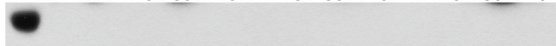

eIF2 $\alpha$

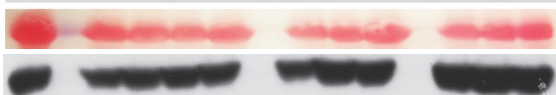**B**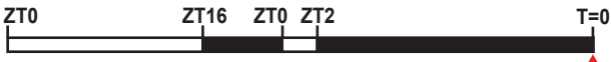

NaCl (min)

+    M    0    10    30    120

eIF2 $\alpha$ -P

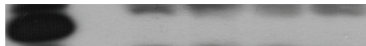

eIF2 $\alpha$

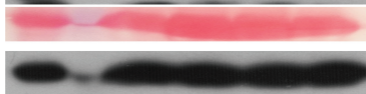



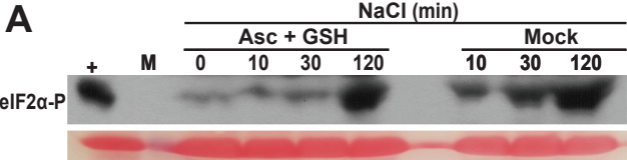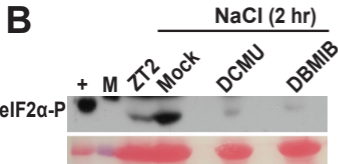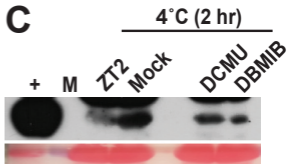

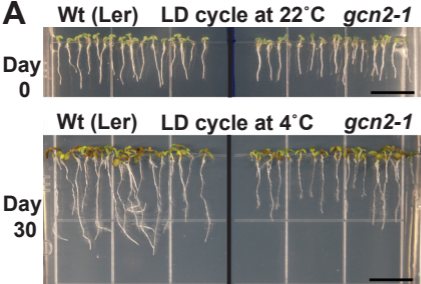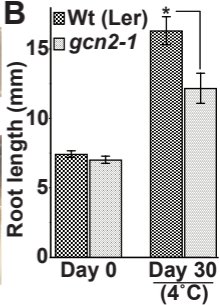

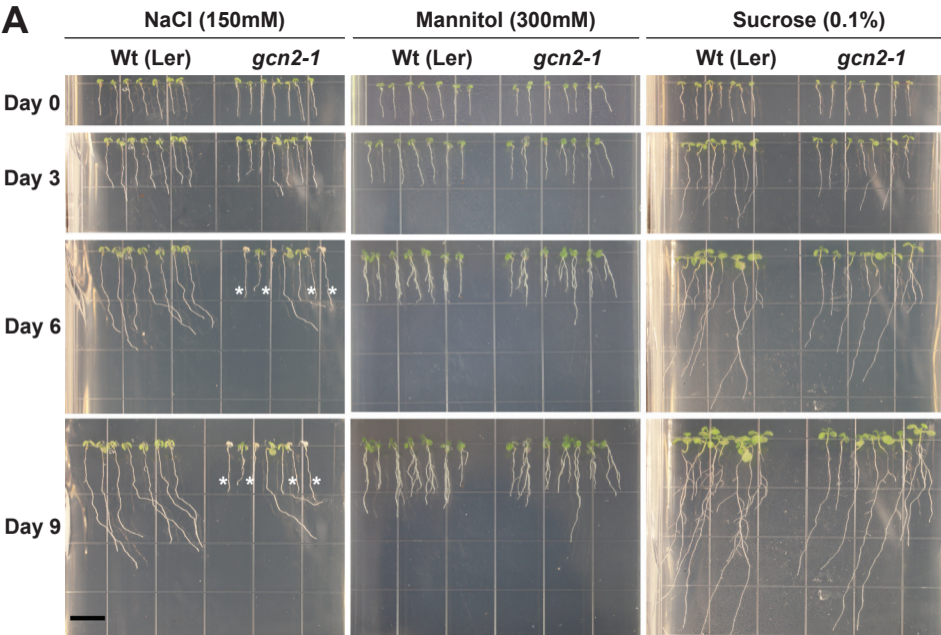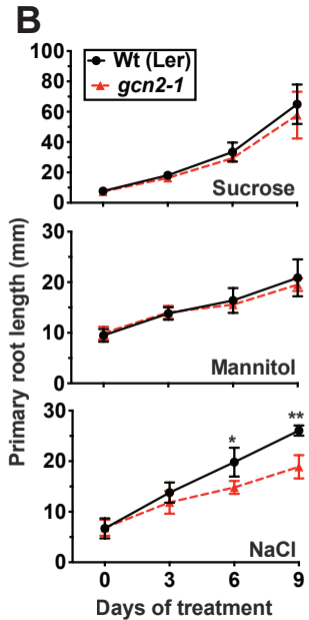

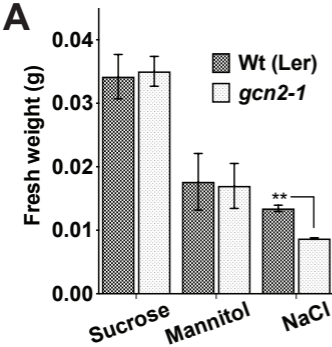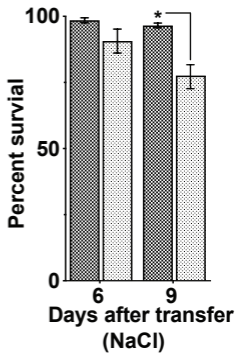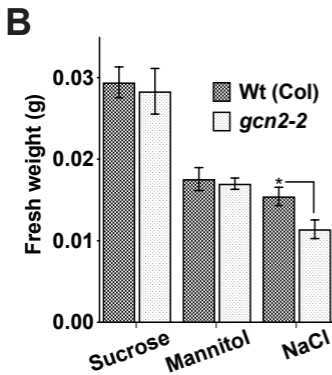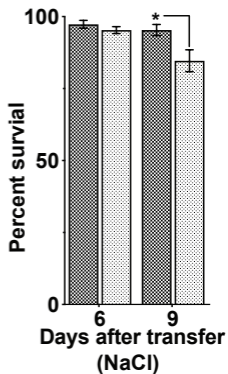

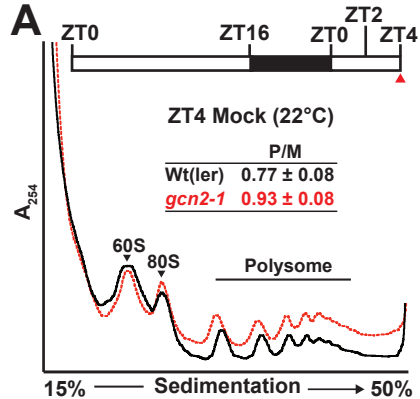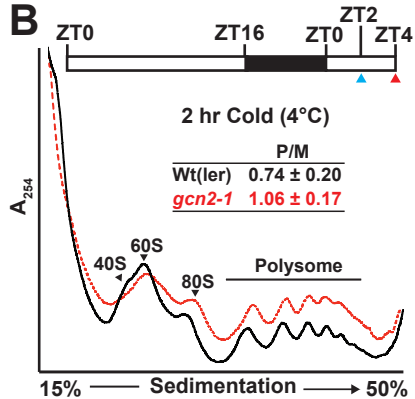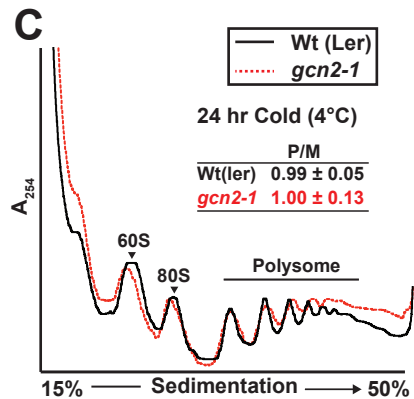

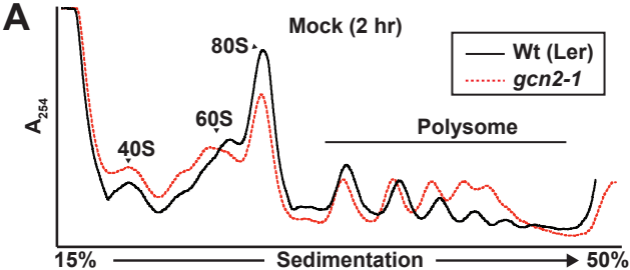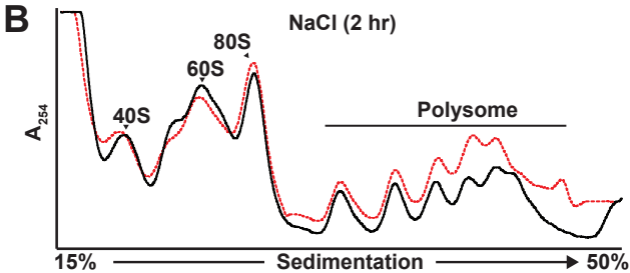

Source: http://biorxiv.org/content/10.1101/849257v1.full.pdf
